# Supplementary material for: Niche-mediated bacterial community composition in continental glacier alluvial valleys under cold and arid environments
Source: Front Microbiol. 2023 Mar 9;14:1120151. doi: 10.3389/fmicb.2023.1120151 (PMC10033870; doi:10.3389/fmicb.2023.1120151)
Supplement: Supplementary file 2 [file Table_1.XLSX]

## Sheet: Sheet1
group	intersection_number	intersection_elements
RE	418	OTU_1607,OTU_2739,OTU_5694,OTU_5115,OTU_2230,OTU_2328,OTU_4007,OTU_4188,OTU_2598,OTU_1415,OTU_2621,OTU_4109,OTU_2454,OTU_2831,OTU_6214,OTU_4839,OTU_6812,OTU_3132,OTU_2182,OTU_4352,OTU_2202,OTU_3245,OTU_1966,OTU_3229,OTU_5427,OTU_7067,OTU_2896,OTU_6873,OTU_2746,OTU_3777,OTU_6824,OTU_1974,OTU_5957,OTU_2400,OTU_3686,OTU_5508,OTU_4342,OTU_3002,OTU_1101,OTU_6228,OTU_2849,OTU_1776,OTU_5707,OTU_2632,OTU…
RD	487	OTU_592,OTU_7185,OTU_2316,OTU_3421,OTU_5821,OTU_1880,OTU_1701,OTU_2342,OTU_1335,OTU_4591,OTU_2289,OTU_412,OTU_4476,OTU_3131,OTU_2225,OTU_5884,OTU_393,OTU_1631,OTU_2647,OTU_4475,OTU_827,OTU_4587,OTU_5266,OTU_1717,OTU_3592,OTU_1393,OTU_2952,OTU_1649,OTU_3756,OTU_2038,OTU_3755,OTU_2396,OTU_2634,OTU_869,OTU_3517,OTU_2766,OTU_999,OTU_4528,OTU_985,OTU_1565,OTU_1778,OTU_1463,OTU_1920,OTU_4281,OTU_754,OT…
RD,RE	153	OTU_4798,OTU_1430,OTU_3444,OTU_4508,OTU_1509,OTU_251,OTU_548,OTU_925,OTU_479,OTU_1718,OTU_955,OTU_2846,OTU_923,OTU_3246,OTU_1438,OTU_2203,OTU_883,OTU_5101,OTU_580,OTU_1654,OTU_1111,OTU_3558,OTU_1319,OTU_3185,OTU_1079,OTU_1210,OTU_6522,OTU_1794,OTU_3806,OTU_1008,OTU_262,OTU_7176,OTU_2622,OTU_1545,OTU_2053,OTU_852,OTU_4168,OTU_4365,OTU_6532,OTU_142,OTU_1321,OTU_525,OTU_1962,OTU_4649,OTU_5510,OTU_41…
RC	552	OTU_4340,OTU_2301,OTU_1502,OTU_1115,OTU_1586,OTU_2892,OTU_5975,OTU_2105,OTU_2612,OTU_2069,OTU_1109,OTU_2050,OTU_2468,OTU_2070,OTU_347,OTU_2553,OTU_3303,OTU_1597,OTU_3275,OTU_2758,OTU_1323,OTU_6366,OTU_2022,OTU_328,OTU_1377,OTU_1252,OTU_1349,OTU_2568,OTU_1687,OTU_1338,OTU_1843,OTU_2633,OTU_1025,OTU_1456,OTU_1497,OTU_537,OTU_1723,OTU_2651,OTU_6963,OTU_1334,OTU_4483,OTU_3014,OTU_3238,OTU_1787,OTU_32…
RC,RE	115	OTU_6117,OTU_1744,OTU_1174,OTU_1339,OTU_1315,OTU_2027,OTU_587,OTU_1350,OTU_1891,OTU_1904,OTU_1246,OTU_1253,OTU_1582,OTU_1828,OTU_846,OTU_1931,OTU_3580,OTU_2140,OTU_1694,OTU_1118,OTU_5321,OTU_998,OTU_2533,OTU_837,OTU_2756,OTU_1648,OTU_1445,OTU_4181,OTU_2090,OTU_1935,OTU_483,OTU_2966,OTU_3313,OTU_1258,OTU_2916,OTU_1894,OTU_1617,OTU_947,OTU_2361,OTU_461,OTU_977,OTU_1165,OTU_4327,OTU_1860,OTU_1363,OT…
RC,RD	69	OTU_2004,OTU_1945,OTU_1929,OTU_1032,OTU_1232,OTU_971,OTU_1242,OTU_648,OTU_2587,OTU_4267,OTU_426,OTU_4356,OTU_789,OTU_934,OTU_2262,OTU_1126,OTU_1020,OTU_4262,OTU_1110,OTU_6056,OTU_1024,OTU_1831,OTU_2251,OTU_2211,OTU_380,OTU_4368,OTU_5827,OTU_501,OTU_450,OTU_2120,OTU_5144,OTU_7010,OTU_4635,OTU_6698,OTU_490,OTU_3477,OTU_1127,OTU_1568,OTU_304,OTU_1064,OTU_6988,OTU_330,OTU_6025,OTU_2158,OTU_4631,OTU_5…
RC,RD,RE	132	OTU_1040,OTU_1498,OTU_1014,OTU_5224,OTU_3882,OTU_1485,OTU_4742,OTU_3743,OTU_434,OTU_1680,OTU_633,OTU_949,OTU_2730,OTU_500,OTU_1177,OTU_3460,OTU_814,OTU_332,OTU_6750,OTU_2529,OTU_407,OTU_2515,OTU_824,OTU_787,OTU_449,OTU_645,OTU_1329,OTU_6316,OTU_990,OTU_4533,OTU_3514,OTU_1296,OTU_1058,OTU_830,OTU_1517,OTU_423,OTU_702,OTU_1423,OTU_1357,OTU_3658,OTU_297,OTU_761,OTU_3660,OTU_962,OTU_1112,OTU_2195,OTU…
RB	264	OTU_4089,OTU_2672,OTU_1239,OTU_811,OTU_2473,OTU_862,OTU_3389,OTU_4025,OTU_1766,OTU_2223,OTU_4801,OTU_4205,OTU_845,OTU_5437,OTU_1418,OTU_6604,OTU_2310,OTU_2871,OTU_3526,OTU_1536,OTU_2382,OTU_3339,OTU_3134,OTU_1478,OTU_4903,OTU_1450,OTU_2344,OTU_1036,OTU_3350,OTU_3419,OTU_3583,OTU_1704,OTU_1635,OTU_4363,OTU_5793,OTU_2661,OTU_1885,OTU_4364,OTU_2018,OTU_2418,OTU_1077,OTU_2215,OTU_3560,OTU_703,OTU_951…
RB,RE	53	OTU_727,OTU_2821,OTU_2867,OTU_1651,OTU_2699,OTU_1197,OTU_1005,OTU_1001,OTU_1806,OTU_730,OTU_1396,OTU_709,OTU_1358,OTU_1469,OTU_4225,OTU_5976,OTU_3692,OTU_1990,OTU_1971,OTU_988,OTU_6029,OTU_1263,OTU_4746,OTU_5834,OTU_2159,OTU_6392,OTU_1235,OTU_4565,OTU_981,OTU_1375,OTU_1326,OTU_1100,OTU_1604,OTU_491,OTU_1204,OTU_138,OTU_975,OTU_1882,OTU_1114,OTU_994,OTU_476,OTU_682,OTU_3269,OTU_486,OTU_1105,OTU_28…
RB,RD	44	OTU_2490,OTU_751,OTU_806,OTU_466,OTU_3511,OTU_1278,OTU_914,OTU_980,OTU_987,OTU_1308,OTU_3674,OTU_2470,OTU_1180,OTU_788,OTU_5546,OTU_4084,OTU_560,OTU_1804,OTU_1414,OTU_244,OTU_385,OTU_1441,OTU_509,OTU_6289,OTU_2583,OTU_186,OTU_1633,OTU_790,OTU_905,OTU_2573,OTU_3149,OTU_849,OTU_3250,OTU_4621,OTU_798,OTU_196,OTU_774,OTU_854,OTU_258,OTU_338,OTU_607,OTU_310,OTU_970,OTU_631
RB,RD,RE	40	OTU_4059,OTU_909,OTU_2694,OTU_833,OTU_530,OTU_692,OTU_1825,OTU_2769,OTU_366,OTU_225,OTU_485,OTU_1082,OTU_6204,OTU_979,OTU_1331,OTU_5484,OTU_3431,OTU_454,OTU_1722,OTU_624,OTU_362,OTU_119,OTU_5873,OTU_1544,OTU_214,OTU_402,OTU_447,OTU_2419,OTU_508,OTU_3745,OTU_766,OTU_917,OTU_5087,OTU_2860,OTU_4505,OTU_289,OTU_1097,OTU_3733,OTU_6906,OTU_3603
RB,RC	68	OTU_6969,OTU_825,OTU_1877,OTU_875,OTU_419,OTU_1290,OTU_660,OTU_884,OTU_795,OTU_1172,OTU_2275,OTU_906,OTU_719,OTU_954,OTU_432,OTU_1068,OTU_1983,OTU_459,OTU_713,OTU_1521,OTU_235,OTU_855,OTU_1587,OTU_1462,OTU_1203,OTU_1080,OTU_622,OTU_2430,OTU_317,OTU_3639,OTU_2237,OTU_557,OTU_7139,OTU_1496,OTU_2261,OTU_4814,OTU_437,OTU_984,OTU_775,OTU_1634,OTU_5446,OTU_579,OTU_5996,OTU_4530,OTU_3187,OTU_910,OTU_156…
RB,RC,RE	64	OTU_3638,OTU_813,OTU_487,OTU_536,OTU_1901,OTU_337,OTU_2092,OTU_260,OTU_271,OTU_2434,OTU_3922,OTU_3852,OTU_231,OTU_881,OTU_3439,OTU_584,OTU_531,OTU_6543,OTU_269,OTU_3562,OTU_1603,OTU_2141,OTU_2308,OTU_615,OTU_442,OTU_267,OTU_529,OTU_597,OTU_361,OTU_826,OTU_646,OTU_435,OTU_505,OTU_4411,OTU_993,OTU_725,OTU_701,OTU_902,OTU_4053,OTU_5092,OTU_7141,OTU_1487,OTU_744,OTU_4710,OTU_414,OTU_732,OTU_4957,OTU_…
RB,RC,RD	37	OTU_211,OTU_311,OTU_1857,OTU_3981,OTU_273,OTU_363,OTU_1862,OTU_652,OTU_1035,OTU_383,OTU_1844,OTU_629,OTU_3675,OTU_357,OTU_840,OTU_867,OTU_5430,OTU_217,OTU_384,OTU_316,OTU_147,OTU_718,OTU_215,OTU_650,OTU_220,OTU_2226,OTU_2457,OTU_860,OTU_1771,OTU_1619,OTU_805,OTU_1938,OTU_1611,OTU_1274,OTU_1000,OTU_444,OTU_4396
RB,RC,RD,RE	100	OTU_1955,OTU_283,OTU_1049,OTU_2334,OTU_714,OTU_379,OTU_3300,OTU_4982,OTU_326,OTU_5140,OTU_786,OTU_249,OTU_842,OTU_109,OTU_666,OTU_223,OTU_3824,OTU_12,OTU_4510,OTU_261,OTU_324,OTU_749,OTU_302,OTU_489,OTU_4019,OTU_218,OTU_679,OTU_507,OTU_1236,OTU_7196,OTU_638,OTU_448,OTU_257,OTU_287,OTU_203,OTU_876,OTU_2921,OTU_105,OTU_6869,OTU_145,OTU_1247,OTU_641,OTU_1140,OTU_294,OTU_851,OTU_57,OTU_233,OTU_161,OT…
RA	450	OTU_3308,OTU_2584,OTU_2924,OTU_1874,OTU_3894,OTU_6116,OTU_1678,OTU_3110,OTU_2404,OTU_2610,OTU_2970,OTU_5639,OTU_1503,OTU_1609,OTU_3234,OTU_5643,OTU_689,OTU_4988,OTU_2278,OTU_2505,OTU_5119,OTU_6306,OTU_5585,OTU_1943,OTU_1613,OTU_2851,OTU_3423,OTU_1090,OTU_1368,OTU_2873,OTU_2600,OTU_2413,OTU_2481,OTU_3312,OTU_1724,OTU_3891,OTU_2521,OTU_4915,OTU_1041,OTU_2537,OTU_1483,OTU_2643,OTU_2052,OTU_2352,OTU_…
RA,RE	59	OTU_6153,OTU_3062,OTU_1799,OTU_1652,OTU_6752,OTU_828,OTU_3307,OTU_1225,OTU_2217,OTU_3800,OTU_4970,OTU_6386,OTU_1379,OTU_1546,OTU_1405,OTU_2747,OTU_2506,OTU_1881,OTU_1272,OTU_1151,OTU_1458,OTU_1137,OTU_2562,OTU_958,OTU_5159,OTU_4377,OTU_3041,OTU_4143,OTU_1780,OTU_1190,OTU_1716,OTU_1993,OTU_3504,OTU_1682,OTU_1910,OTU_1171,OTU_1638,OTU_2155,OTU_1417,OTU_773,OTU_1221,OTU_6305,OTU_1529,OTU_318,OTU_201…
RA,RD	24	OTU_2318,OTU_1223,OTU_2927,OTU_3723,OTU_1561,OTU_995,OTU_3898,OTU_1639,OTU_1908,OTU_5828,OTU_1300,OTU_3627,OTU_1510,OTU_1830,OTU_4246,OTU_1575,OTU_2381,OTU_1150,OTU_2238,OTU_3602,OTU_681,OTU_5535,OTU_769,OTU_4926
RA,RD,RE	32	OTU_1156,OTU_734,OTU_1388,OTU_1690,OTU_1675,OTU_1829,OTU_1088,OTU_1560,OTU_674,OTU_3064,OTU_1157,OTU_1395,OTU_1200,OTU_739,OTU_677,OTU_1182,OTU_1719,OTU_232,OTU_1250,OTU_194,OTU_1019,OTU_1593,OTU_1061,OTU_236,OTU_1506,OTU_3119,OTU_4790,OTU_1023,OTU_821,OTU_2711,OTU_891,OTU_1012
RA,RC	42	OTU_5358,OTU_4653,OTU_571,OTU_1608,OTU_3319,OTU_4024,OTU_956,OTU_1987,OTU_1896,OTU_1178,OTU_2138,OTU_1818,OTU_3118,OTU_3861,OTU_1264,OTU_1556,OTU_415,OTU_2080,OTU_2233,OTU_2378,OTU_2935,OTU_1816,OTU_460,OTU_1471,OTU_3294,OTU_1736,OTU_4618,OTU_1703,OTU_477,OTU_1075,OTU_3716,OTU_735,OTU_1420,OTU_5190,OTU_4586,OTU_1091,OTU_2209,OTU_1824,OTU_957,OTU_1167,OTU_2025,OTU_3283
RA,RC,RE	44	OTU_6655,OTU_5559,OTU_1977,OTU_4667,OTU_1658,OTU_632,OTU_5983,OTU_873,OTU_6849,OTU_2914,OTU_2733,OTU_1152,OTU_506,OTU_1684,OTU_4772,OTU_1227,OTU_4287,OTU_1031,OTU_4518,OTU_2118,OTU_1975,OTU_847,OTU_722,OTU_1136,OTU_1870,OTU_6145,OTU_2852,OTU_779,OTU_644,OTU_1078,OTU_2432,OTU_3533,OTU_572,OTU_1202,OTU_3683,OTU_353,OTU_675,OTU_300,OTU_7200,OTU_2832,OTU_900,OTU_374,OTU_2721,OTU_3827
RA,RC,RD	16	OTU_463,OTU_1845,OTU_1645,OTU_1209,OTU_3271,OTU_991,OTU_1411,OTU_871,OTU_717,OTU_1062,OTU_1571,OTU_657,OTU_2099,OTU_1436,OTU_2848,OTU_783
RA,RC,RD,RE	84	OTU_1685,OTU_360,OTU_636,OTU_523,OTU_4681,OTU_3578,OTU_2977,OTU_1033,OTU_757,OTU_285,OTU_960,OTU_3724,OTU_1013,OTU_1803,OTU_1271,OTU_494,OTU_1337,OTU_2085,OTU_6274,OTU_1121,OTU_2132,OTU_2057,OTU_1155,OTU_758,OTU_250,OTU_782,OTU_831,OTU_7154,OTU_1095,OTU_4224,OTU_4272,OTU_320,OTU_1018,OTU_496,OTU_1370,OTU_748,OTU_3977,OTU_1520,OTU_2014,OTU_4473,OTU_1106,OTU_539,OTU_1224,OTU_696,OTU_156,OTU_1347,OT…
RA,RB	23	OTU_1476,OTU_2858,OTU_4370,OTU_5933,OTU_2785,OTU_1602,OTU_226,OTU_2145,OTU_2340,OTU_1821,OTU_1144,OTU_1494,OTU_724,OTU_599,OTU_5480,OTU_1692,OTU_3982,OTU_740,OTU_4018,OTU_916,OTU_3626,OTU_1699,OTU_5453
RA,RB,RE	28	OTU_5433,OTU_1470,OTU_504,OTU_726,OTU_1163,OTU_427,OTU_7105,OTU_996,OTU_1447,OTU_1399,OTU_396,OTU_1505,OTU_4583,OTU_1522,OTU_517,OTU_2274,OTU_1186,OTU_1852,OTU_1133,OTU_1817,OTU_897,OTU_659,OTU_1364,OTU_1435,OTU_524,OTU_4546,OTU_1277,OTU_6626
RA,RB,RD	8	OTU_169,OTU_303,OTU_3899,OTU_665,OTU_1868,OTU_397,OTU_762,OTU_549
RA,RB,RD,RE	26	OTU_848,OTU_989,OTU_653,OTU_63,OTU_455,OTU_1309,OTU_4321,OTU_75,OTU_707,OTU_2456,OTU_640,OTU_4142,OTU_1353,OTU_416,OTU_376,OTU_4039,OTU_71,OTU_1457,OTU_705,OTU_2298,OTU_309,OTU_445,OTU_1324,OTU_174,OTU_457,OTU_1714
RA,RB,RC	20	OTU_623,OTU_453,OTU_802,OTU_1507,OTU_4797,OTU_253,OTU_46,OTU_519,OTU_614,OTU_1028,OTU_1034,OTU_268,OTU_603,OTU_617,OTU_1259,OTU_1129,OTU_403,OTU_5808,OTU_2964,OTU_737
RA,RB,RC,RE	115	OTU_462,OTU_370,OTU_1554,OTU_191,OTU_254,OTU_611,OTU_6394,OTU_643,OTU_926,OTU_66,OTU_843,OTU_2772,OTU_121,OTU_245,OTU_4942,OTU_2669,OTU_3784,OTU_199,OTU_2976,OTU_319,OTU_2728,OTU_167,OTU_807,OTU_118,OTU_771,OTU_613,OTU_382,OTU_3790,OTU_627,OTU_388,OTU_1055,OTU_5424,OTU_334,OTU_146,OTU_581,OTU_651,OTU_209,OTU_839,OTU_301,OTU_348,OTU_1065,OTU_2402,OTU_474,OTU_4493,OTU_373,OTU_5977,OTU_5014,OTU_4091…
RA,RB,RC,RD	8	OTU_327,OTU_815,OTU_733,OTU_569,OTU_1702,OTU_799,OTU_1,OTU_162
RA,RB,RC,RD,RE	340	OTU_173,OTU_1442,OTU_935,OTU_576,OTU_219,OTU_5564,OTU_68,OTU_160,OTU_350,OTU_2427,OTU_1089,OTU_2467,OTU_2288,OTU_97,OTU_120,OTU_50,OTU_41,OTU_3936,OTU_392,OTU_176,OTU_695,OTU_3485,OTU_420,OTU_1175,OTU_2580,OTU_543,OTU_98,OTU_602,OTU_53,OTU_114,OTU_242,OTU_3594,OTU_325,OTU_9,OTU_240,OTU_4659,OTU_1907,OTU_188,OTU_1083,OTU_198,OTU_180,OTU_668,OTU_354,OTU_746,OTU_102,OTU_200,OTU_4160,OTU_51,OTU_78,OT…
